# Supplementary material for: Validation of the OncoMasTR Risk Score in Estrogen Receptor–Positive/HER2-Negative Patients: A TransATAC study
Source: Oxford University Press journal article supplement (doi:10.1158/1078-0432.ccr-19-0712), 2019-10-22
Supplement: 10780432ccr190712-sup-218057_3_supp_5830470_pz7nm4.pdf [file 10780432ccr190712-sup-218057_3_supp_5830470_pz7nm4.pdf]

| <b>All patients ER-positive, HER2-negative</b> | <b>Primary cohort (N=648)</b> |
|------------------------------------------------|-------------------------------|
| Age (years), median (IQR)                      | 63.8 (58.4-71.0)              |
| BMI (kg/m <sup>2</sup> ), median (IQR) (N=596) | 26.5 (23.5-29.8)              |
| Node-negative                                  | 484 (74.7%)                   |
| Node 1-3 positive                              | 164 (25.3%)                   |
| Tumor size (mm), median (IQR)                  | 18 (14-23)                    |
| Grade well differentiated                      | 126 (19.4%)                   |
| Grade moderately differentiated                | 396 (61.1%)                   |
| Grade poorly differentiated                    | 126 (19.4%)                   |
| Chemotherapy                                   | -                             |
| Radiotherapy                                   | 437 (67.4%)                   |
| Previous HRT                                   | 223 (34.4%)                   |
